# Supplementary material for: The implications of dynamic observation of immunoinflammatory indices in patients with resectable gastric cancer
Source: Research Square preprint supplement (doi:10.21203/rs.3.rs-4901147/v1), 2024-10-11
Supplement: Supplementary file 1 [file c132ca38328df093a8c6416a.docx]

**Table-1** Clinical baseline features

| **Characteristic** | **（N=93）** |
| --- | --- |
| Age | 51.83±10.63 |
| Sex  Male  Female | 69 (74.2%)  24 (25.8%) |
| BMI (kg/m²)  <18.5  18.5~24.0  ≥24.0 | 6 (6.5%)  53 (57.0%)  34 (36.5%) |
| Primary location  Upper  Middle  Low | 10 (10.8%)  26 (28.0%)  57 (61.2%) |
| Resection site  Total  Proximal  Distal | 31 (33.3%)  6 (6.5%)  56 (60.2) |
| Histologic type  Well  Moderate  Poor | 6 (6.5%)  51 (54.8%)  36 (38.7%) |
| Largest tumor size (cm)  ≤2.8  >2.8 | 32 (34.4%)  61 (65.6%) |
| Number of lymph node dissection  ≤21  >21 | 49 (52.7%)  44 (47.3%) |
| TNM stage  Ⅰ  Ⅱ  Ⅲ | 4 (4.3%)  27 (29.0%)  62 (66.7%) |
| Neural invasion  Positive  Negative | 83 (89.2%)  10 (10.8%) |
| Lymphovascular invasion  Positive  Negative | 77 (82.8%)  16 (17.2%) |

**Note**: Value are presented as the median (range) or n (%).

**Abbreviation**: BMI, body mass index; TNM, tumor-node-metastasis

**Table-2** Grouping of repeated measures indicators

| **variable** | **（N=93）** |
| --- | --- |
| NLR  NLR cluster 1  NLR cluster 2  NLR cluster 3 | 31 (33.3%)  8 (8.6%)  54 (58.1%) |
| PLR  PLR cluster 1  PLR cluster 2  PLR cluster 3 | 40 (43.0%)  19 (20.4%)  34 (36.6%) |
| LMR  LMR cluster 1  LMR cluster 2  LMR cluster 3 | 24 (25.8%)  37 (39.8%)  32 (34.4%) |
| SII  SII cluster 1  SII cluster 2 | 45 (48.4%)  48 (51.6%) |
| PNI  PNI cluster 1  PNI cluster 2  PNI cluster 3 | 34 (36.6%)  33 (35.5%)  26 (27.9%) |
| CEA  CEA cluster 1  CEA cluster 2  CEA cluster 3  CEA cluster 4  CEA cluster 5 | 20 (21.5%)  17 (18.3%)  23 (24.7%)  6 (6.5%)  27 (29.0%) |
| AFP  AFP cluster 1  AFP cluster 2  AFP cluster 3  AFP cluster 4 | 22 (23.7%)  17 (18.3%)  26 (28.0%)  28 (30.0%) |
| CA125  CA125 cluster 1  CA125 cluster 2  CA125 cluster 3  CA125 cluster 4 | 24 (25.8%)  16 (17.2%)  22 (23.7%)  31 (33.3%) |
| CA199 |  |
| CA199 cluster 1  CA199 cluster 2  CA199 cluster 3  CA199 cluster 4 | 18 (19.4%)  29 (31.2%)  18 (19.4%)  28 (30.0%) |

**Note**: Value are presented as the n (%)

**Abbreviation**: NLR, neutrophil-to-lymphocyte ratio; PLR, platelet-to-lymphocyte ratio; LMR, lymphocyte-to-monocyte ratio; SII, systemic immune-inflammation index; PNI, prognostic nutritional index; CEA, carcinoembryonic antigen; AFP, alpha-fetoprotein; CA125, cancer antigen 125; CA19-9, carbohydrate associated antigen 19-9

**Table-3** Univariate and multivariate cox regression

| **Characteristic** | **Univariate analysis**  **HR (95% CI)** | **P value** | **Multivariate analysis**  **HR (95% CI)** | **P value** |
| --- | --- | --- | --- | --- |
| Age | 1.02 (0.98-1.05) | 0.415 |  |  |
| Sex  Male vs Female | 1.02 (0.46-2.28) | 0.966 |  |  |
| BMI (kg/m²)  <18.5  18.5~24.0  ≥24.0 | 0.89 (0.42-1.89)  1  0.99 (0.22-4.17) | 0.957 |  |  |
| NLR  NLR cluster 1  NLR cluster 2  NLR cluster 3 | 0.81 (0.38-1.73)  0.28 (0.04-2.06)  1 | 0.423 |  |  |
| PLR  PLR cluster 1  PLR cluster 2  PLR cluster 3 | - 1. (0.24-1.31)   1.36 (0.58-3.19)  1 | 0.160 |  |  |
| LMR  LMR cluster 1  LMR cluster 2  LMR cluster 3 | 1.04 (0.44-2.46)  0.65 (0.28-1.51)  1 | 0.515 |  |  |
| SII  SII cluster 1  SII cluster 2 | 1.21 (0.60-2.44)  1 | 0.605 |  |  |
| PNI  PNI cluster 1  PNI cluster 2  PNI cluster 3 | 1.05 (0.45-2.46)  0.70 (0.28-1.76)  1 | 0.013 | 0.33 (0.12-0.89)  0.31 (0.11-0.86)  1 | 0.046 |
| CEA  CEA cluster 1  CEA cluster 2  CEA cluster 3  CEA cluster 4  CEA cluster 5 | 0.85 (0.33-2.20)  0.12 (0.02-0.93)  0.84 (0.34-2.09)  1.80 (0.57-5.66)  1 | 0.192 |  |  |
| AFP  AFP cluster 1  AFP cluster 2  AFP cluster 3  AFP cluster 4 | 0.50 (0.19-1.33)  0.43 (0.14-1.31)  0.59 (0.25-1.43)  1 | 0.325 |  |  |
| CA125  CA125 cluster 1  CA125 cluster 2  CA125 cluster 3  CA125 cluster 4  CA199 | 0.53 (0.18-1.52)  1.16 (0.45-2.99)  0.92 (0.37-2.30)  1 | 0.576 |  |  |
| CA199 cluster 1  CA199 cluster 2  CA199 cluster 3  CA199 cluster 4 | 0.46 (0.15-1.43)  0.58 (0.24-1.42)  0.90 (0.35-2.27)  1 | 0.444 |  |  |
| Primary location  Upper  Middle  Low | 1  0.89 (0.30-2.62)  0.82 (0.25-2.73) | 0.949 |  |  |
| Resection site  Total  Proximal  Distal | 1  0.57 (0.13-2.48)  0.45 (0.22-0.94) | 0.034 |  |  |
| Histologic type  Well  Moderate  Poor | 1  1.11 (0.26-4.78)  0.78 (0.17-3.55) | 0.655 |  |  |
| Largest tumor size (cm)  ≤2.8  >2.8 | 1  1.67 (0.75-3.73) | 0.213 |  |  |
| Number of lymph node dissection  ≤21  >21 | 1  0.93 (0.46-1.90) | 0.850 |  |  |
| TNM stage  Ⅰ  Ⅱ  Ⅲ | 0 (0-inf)  0.124 (0.03-0.518)  1 | 0.017 | 0 (0-inf)  0.09 (0.02-0.41)  1 | 0.007 |
| Neural invasion  Positive vs Negative | 0.24 (0.03-1.78) | 0.163 |  |  |
| Lymphovascular invasion  Positive vs Negative | 0.65 (0.22-1.86) | 0.420 |  |  |

**Note**: Value are presented as the median (range) or n (%).

**Abbreviation**: BMI, body mass index; NLR, neutrophil-to-lymphocyte ratio; PLR, platelet-to-lymphocyte ratio; LMR, lymphocyte-to-monocyte ratio; SII, systemic immune-inflammation index; PNI, prognostic nutritional index; CEA, carcinoembryonic antigen; AFP, alpha-fetoprotein; CA125, cancer antigen 125; CA19-9, carbohydrate associated antigen 19-9; TNM, tumor-node-metastasis
