# Supplementary material for: The implications of dynamic observation of immunoinflammatory indices in patients with resectable gastric cancer
Source: Research Square preprint supplement (doi:10.21203/rs.3.rs-4901147/v1), 2024-10-11
Supplement: Supplementary file 2 [file e5cf0833764a4baea88f90b9.docx]

**Statements**

**Author contributions**: All authors contributed to the study conception and design. YD designed the study. YD, XC, JS, YG, SL, ZL collected the data. YD, XC, JS, YG, SL, ZL analyzed the data. YD, XC, JS visualized the data. YD drafted the manuscript. JL revised the manuscript.

**Funding：**The authors declare that no funds, grants, or other support was received during the preparation of this manuscript.

**Data availability:** The datasets generated during and/or analyzed

during the current study are available from the corresponding author on reasonable request.

**Conflict of interest:** The authors declare that there is no conflict of interest.

**Ethical approval:** This is an observational study. The Xijing Hospital Ethics Committee has confirmed that no ethical approval is required.
